# Supplementary material for: Hundreds of dual-stage antimalarial molecules discovered by a functional gametocyte screen
Source: PubMed Central journal article supplement (PMC5442318; doi:10.1038/ncomms15160), 2017-05-17
Supplement: ncomms15160-s1.pdf [file ncomms15160-s1.pdf]

**Supplementary Figure 1. TCAMS chemical series previously characterized at GSK that were progressed in the *Pf* FGAA screen.** Scaffolds that were previously identified by GSK as promising antimalarial schizonticidal starting points are depicted in blue and compounds closely related to the GSK Published Kinase Inhibitor Set are depicted in green. One scaffold that belongs to both groups is shown in pink.

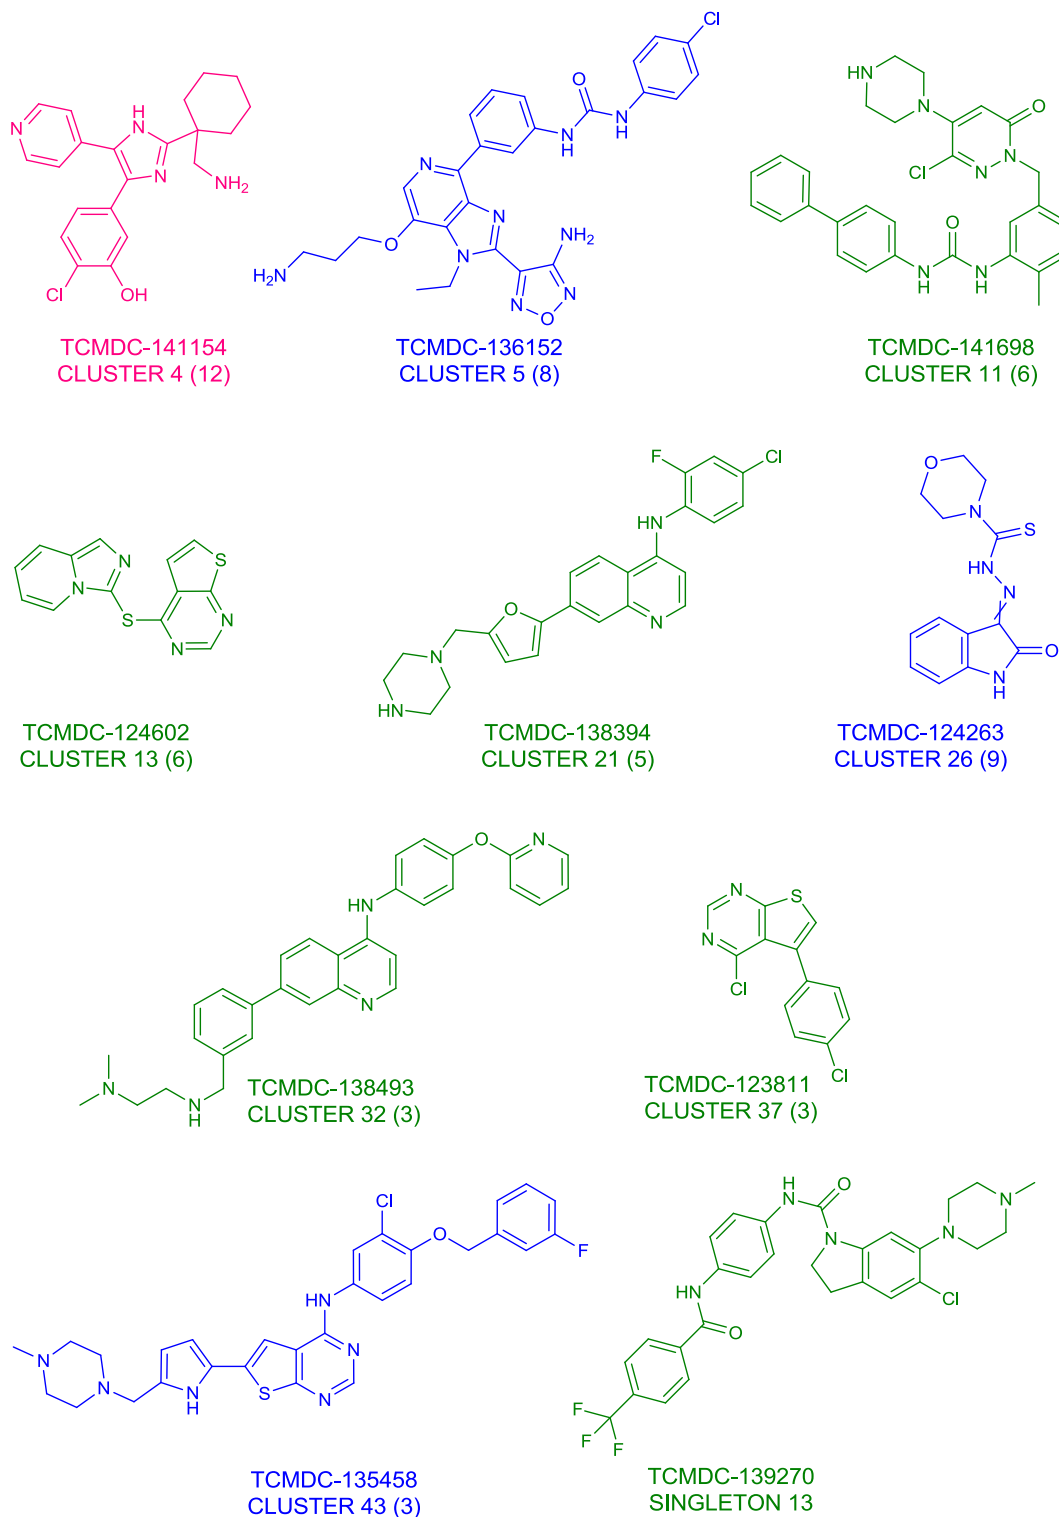

**Supplementary Table 1. Results with raw data obtained from each independent experiment performed with the six compounds tested in the SMFA.**

| Parameter Observed                              | TCMDC-141070 |          |          | TCMDC-124559 |                       |          | TCMDC-125345 |          | TCMDC-141698 |          | TCMDC-123767 |          | TCMDC-141154 |          |
|-------------------------------------------------|--------------|----------|----------|--------------|-----------------------|----------|--------------|----------|--------------|----------|--------------|----------|--------------|----------|
|                                                 | Expt 1       | Expt 2   | Expt 3   | Expt 1       | Expt 2                | Expt 3   | Expt 1       | Expt 2   | Expt 1       | Expt 2   | Expt 1       | Expt 2   | Expt 1       | Expt 2   |
| Total Number of Fed Mosquitoes in Test Compound | 44           | 45       | 38       | 38           | 47                    | 53       | 21           | 41       | 43           | 46       | 38           | 62       | 53           | 60       |
| Total Number of Fed Mosquitoes in DMSO Control  | 23           | 51       | 55       | 23           | 51                    | 55       | 23           | 55       | 54           | 67       | 54           | 67       | 54           | 67       |
| Prevalence of Infection in DMSO Control         | 78.2         | 70       | 91       | 78.2         | 70                    | 91       | 78.2         | 91       | 78           | 88       | 78           | 88       | 78           | 88       |
| Mean Oocyst Intensity in DMSO Control           | 4.6          | 1.8      | 4.6      | 4.6          | 1.8                   | 4.6      | 4.6          | 4.6      | 5.1          | 5.3      | 5.1          | 5.3      | 5.1          | 5.3      |
| Prevalence of Infection in Test Compound        | 0            | 15.4     | 0        | 74.29        | 70                    | 79.17    | 35.97        | 38.22    | 14.04        | 8.8      | 13.26        | 13.2     | 5.46         | 6.16     |
| Mean Oocyst Intensity in Test Compound          | 0            | 0.2      | 0        | 4.1          | 2.5                   | 2.8      | 0.7          | 1.0      | 0.2          | 0.2      | 0.1          | 0.1      | 0.1          | 0.1      |
| Mann Whitney Test, two tailed                   | p<0.0001     | p<0.0001 | p<0.0001 | p=0.5477     | p=0.0215 <sup>#</sup> | p=0.0069 | p=0.0012     | p<0.0001 | p<0.0001     | p<0.0001 | p<0.0001     | p<0.0001 | p<0.0001     | p<0.0001 |
| Statistical Significance                        | ****         | ****     | ****     | ns           | *                     | **       | **           | ****     | ****         | ****     | ****         | ****     | ****         | ****     |
| Exflagellation Inhibition %                     | 75           | 99       | 99       | 28           | 0                     | 60       | 47           | 50       | 84           | 87       | 88           | 88       | 97           | 97       |
| Oocyst Reduction Intensity %                    | 100          | 92       | 100      | 24           | 0                     | 39       | 88           | 83       | 97           | 97       | 97           | 97       | 99           | 98       |
| Block in Transmission %                         | 100          | 78       | 100      | 5            | 0                     | 13       | 54           | 58       | 82           | 90       | 83           | 85       | 93           | 93       |

The Mann Whitney Test was used to compare the difference between the median oocyst intensity in the DMSO Control versus the Test group and treatments which show a statistically significant distribution are represented with asterisks: p<0.1, p<0.01, p<0.001, p<0.0001 is represented by \*, \*\*, \*\*\*, \*\*\*\* respectively. The exflagellation inhibition, block in transmission and reduction in oocyst intensity are calculated using the formulas provided in Supplementary Note 1. All data were analyzed using Microsoft Excel and GraphPad PRISM. # p value represents an increase in oocyst mean.

**Supplementary Note 1.** Formulas used to calculate raw data from SMFA experiments (Supplementary Table 1).

Exflagellation Inhibition was calculated using the following formula:

$$EI\% = 100 - \left( \frac{E_T * 100}{E_C} \right)$$

EI% = Exflagellation Inhibition Percentage

$E_T$  and  $E_C$  are the number of exflagellating centers/field in test and control groups, respectively.

Transmission Blocking Potential was calculated using the following formulas:

$$OR\% = 100 - \left( \frac{OM_T * 100}{OM_C} \right)$$

OR%= Oocyst Reduction Percentage

$OM_T$  = Oocyst Mean Intensity in Test group

$OM_C$  = Oocyst Mean Intensity in Control group

$$BiT\% = 100 - \left( \frac{P_T * 100}{P_C} \right)$$

BiT%= Block in Transmission Percentage

$P_T$ = Percentage of infected mosquitoes in the Test Group

$P_C$ = Percentage of Infected Mosquitoes in Control Group

### Supplementary References:

1. Gamo, F. J. *et al.* Thousands of chemical starting points for antimalarial lead identification. *Nature* **465**, 305-310, doi:10.1038/nature09107 (2010).
